# Supplementary material
Source: MDPI journal article supplement (https://www.mdpi.com/1424-2818/15/8/903)
Supplement: s1 [file s1]

Archive with 2 entries (2 files):
- diversity-2498999-Figure S1.pdf
- diversity-2498999-supplementary.pdf
