# Supplementary material
Source: MDPI journal article supplement (https://www.mdpi.com/1424-2818/15/8/903)
Supplement: s1 [file s1 › diversity-2498999-supplementary.pdf]

**Table S1.1:** Comparison between current and future distribution area of *S. dux* based on natural Jenks map classification.

| Suitability Class | Current and Future distribution area of <i>S. dux</i> (km <sup>2</sup> ) |                               |                |                      |                               |                |
|-------------------|--------------------------------------------------------------------------|-------------------------------|----------------|----------------------|-------------------------------|----------------|
|                   | Current distribution                                                     | Future distribution (RCP 2.6) | Change in Area | Current distribution | Future distribution (RCP 8.5) | Change in Area |
| Rare              | 6676668.653                                                              | 6823052.041                   | -146,383.388   | 6676668.653          | 8559648.503                   | -1,882,979.85  |
| Low               | 8607603.534                                                              | 9076342.411                   | -468,738.877   | 8607603.534          | 11624954.73                   | -3,017,351.196 |
| Medium            | 12906129.19                                                              | 13516721.94                   | -610,592.75    | 12906129.19          | 15486361.82                   | -2,580,232.63  |
| High              | 13771771.49                                                              | 13476296.17                   | 295,475.32     | 13771771.49          | 13532464.35                   | 239,307.14     |
| Very High         | 7204117.25                                                               | 6837461.163                   | 366,656.087    | 7204117.25           | 6802618.088                   | 401,499.162    |

**Table S1.2:** Comparison between current and future distribution area of *S. haemorrhoidalis* based on natural Jenks map classification.

| Suitability Class | Current and Future distribution area of <i>S. haemorrhoidalis</i> (km <sup>2</sup> ) |                               |                |                      |                               |                |
|-------------------|--------------------------------------------------------------------------------------|-------------------------------|----------------|----------------------|-------------------------------|----------------|
|                   | Current distribution                                                                 | Future distribution (RCP 2.6) | Change in Area | Current distribution | Future distribution (RCP 8.5) | Change in Area |
| Rare              | 8198600.328                                                                          | 8208601.828                   | -10,001.5      | 8198600.328          | 8377141.951                   | -178,541.623   |
| Low               | 9058186.691                                                                          | 2506421.393                   | 6,551,765.298  | 9058186.691          | 2362460.53                    | 6,695,726.161  |
| Medium            | 10228613.27                                                                          | 1818312.768                   | 8,410,300.502  | 10228613.27          | 2221366.395                   | 8,007,246.875  |
| High              | 9829399.165                                                                          | 2292026.44                    | 7,537,372.725  | 9829399.165          | 1754066.418                   | 8,075,332.747  |
| Very High         | 3430542.684                                                                          | 838580.8291                   | 2,591,961.8549 | 3430542.684          | 948618.2596                   | 2,481,924.4244 |
