# Supplementary material
Source: MDPI journal article supplement (https://www.mdpi.com/1424-2818/15/8/903)

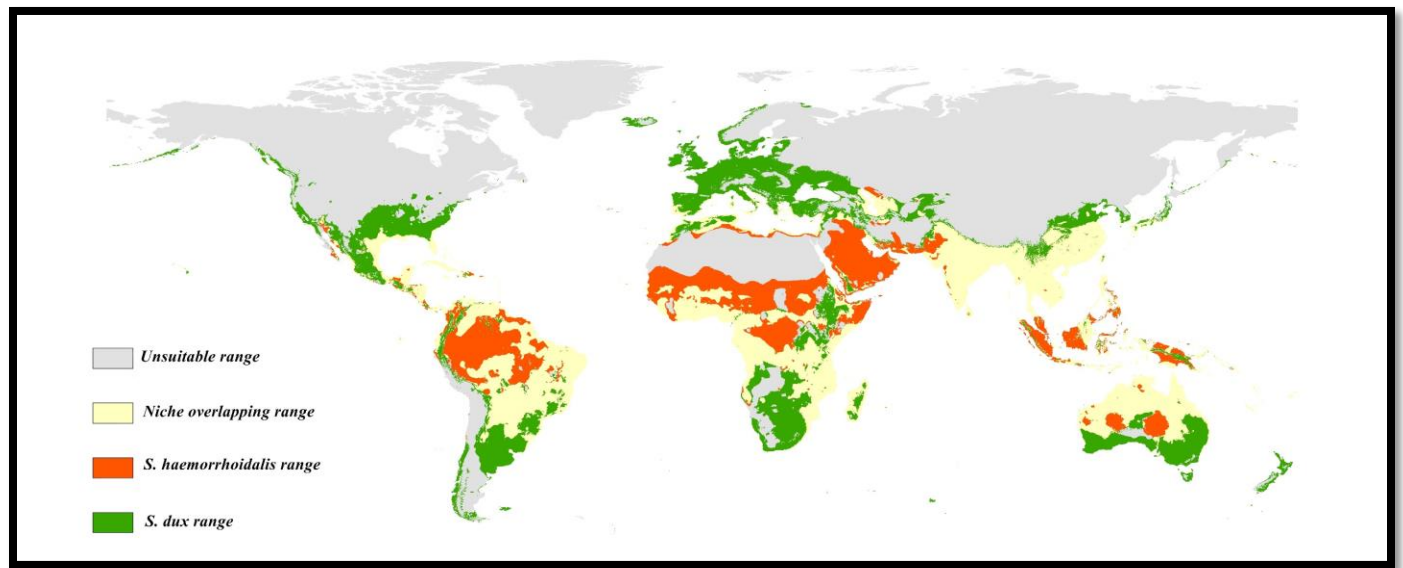

**Figure S1:** Niche overlapping between *S. dux* and *S. haemorrhoidalis*

Supplement: s1 [file s1 › diversity-2498999-Figure S1.pdf]
